# Supplementary material
Source: publisher figshare collection journal article supplement (https://gsajournals.figshare.com/articles/dataset/_/6104780)

# Family A

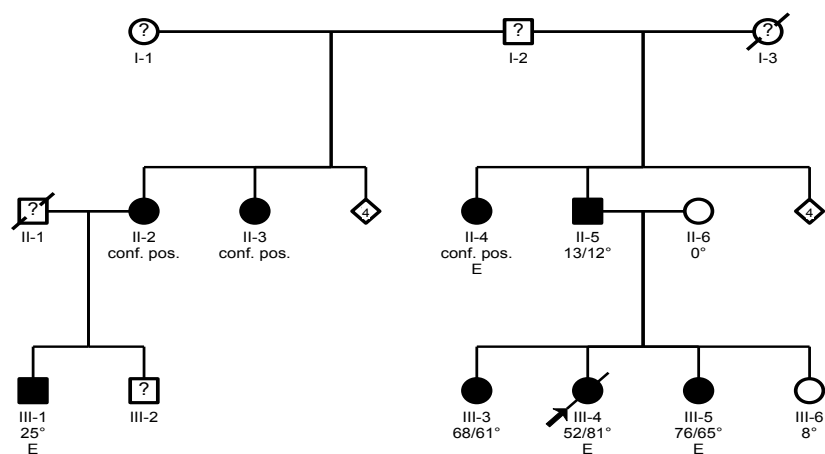

# Family B

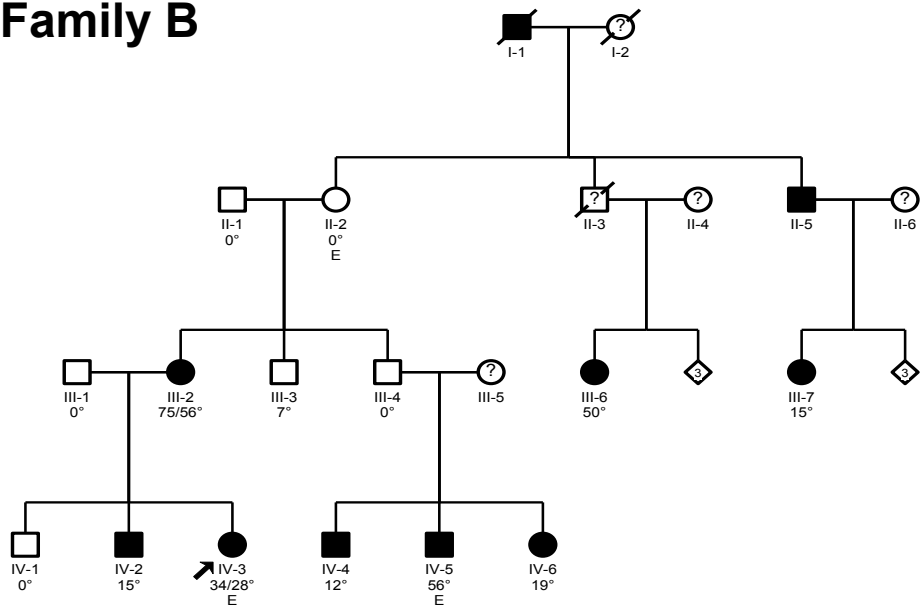

# Family C

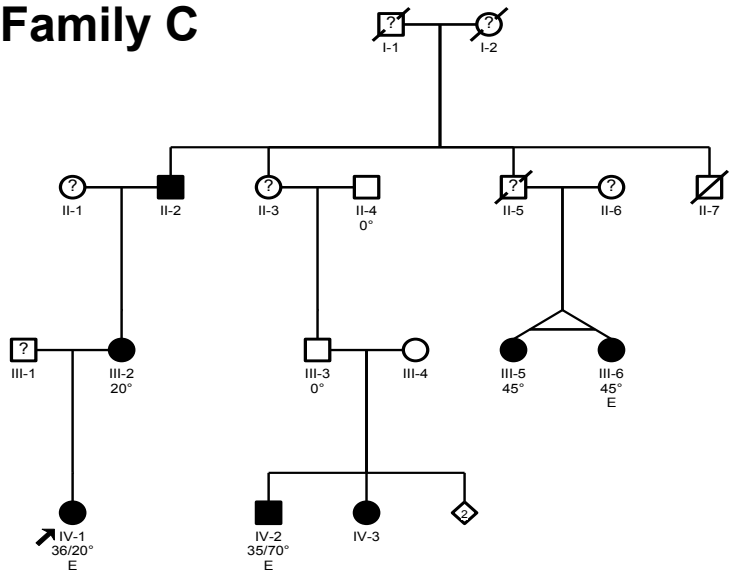

Family D

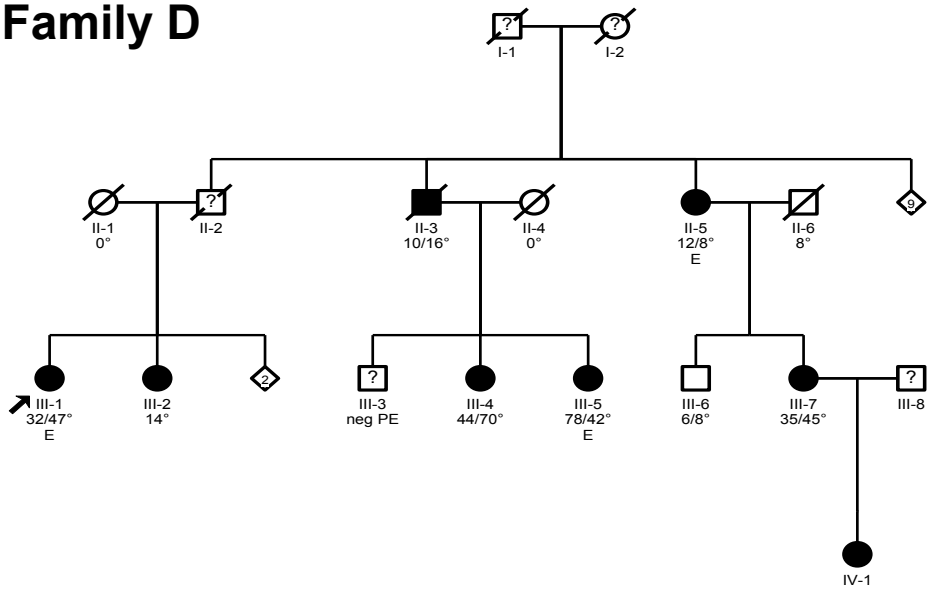

Family E

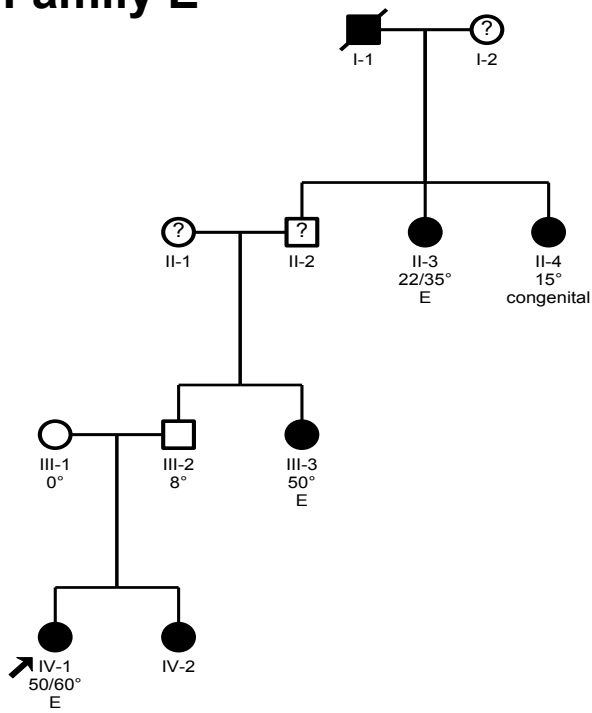

Supplement: Supplementary file 1 [file 1]
